# Supplementary material for: N-Acetylcysteine alleviates high fat diet-induced hepatic steatosis and liver injuryviaregulating the intestinal microecology in mice
Source: Royal Society of Chemistry journal article supplement (doi:10.1039/d1fo03952k), 2022-01-01
Supplement: d1fo03952k4.pdf [file d1fo03952k4.pdf]

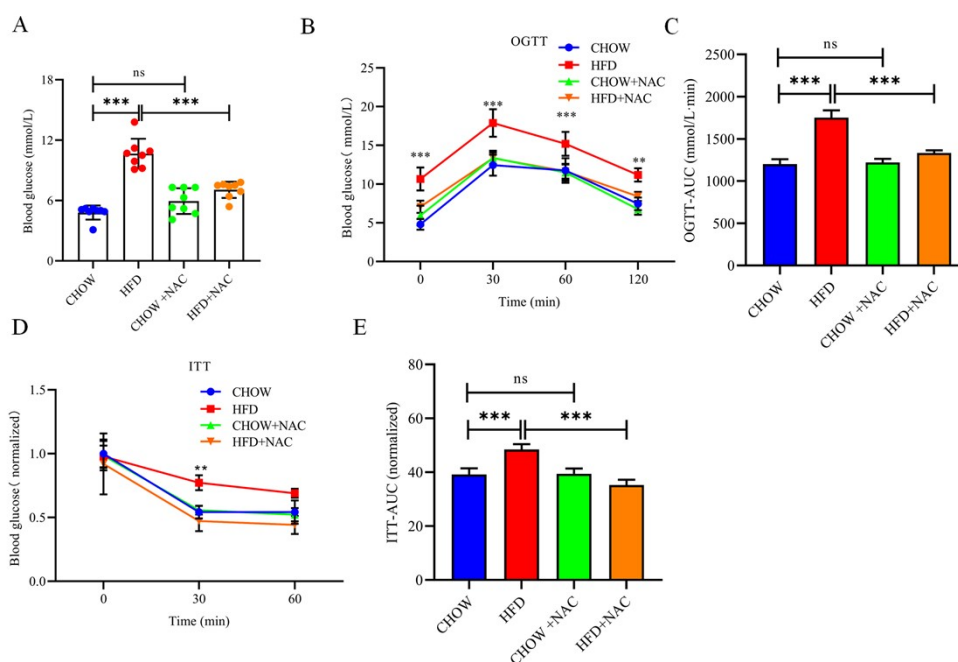

**Suppl. Fig. 1 NAC improves hyperglycemia and hyperinsulinemia of C57BL/6 mice induced by HFD.** (A) Blood glucose after 12 h fasting of mice. (B) Oral glucose tolerance test (OGTT). Mice were fasted for 12 h and gavaged. (C) Area under the curve (AUC) from A. (D) Insulin tolerance test (ITT). Mice were fasted for 4 h and injected. (E) Area under the curve (AUC) from D.  $n = 8$  per group. CHOW, a chow diet; HFD, high-fat diet; NAC, N-acetylcysteine.  $**P < 0.01$ ,  $***P < 0.001$  versus the HFD group; ns, not significant.

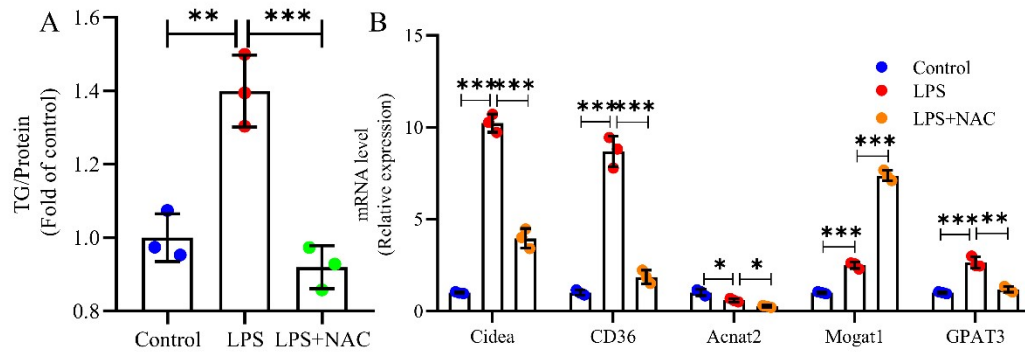

**Suppl. Fig. 2** Suppressive effect of NAC on LPS-induced high levels of TG in AML12 cells. (A) TG level. (B) qRT-PCR showing the expressions of Cidea, CD36, Acnat2, Mogat1, and GPAT3 in AML12 cells induced by LPS. n = 3 per group. TG, triglyceride; LPS, lipopolysaccharide; NAC, N-acetylcysteine. \* $P < 0.05$ , \*\* $P < 0.01$ , \*\*\* $P < 0.001$  versus the LPS group.
