# Supplementary material for: N-Acetylcysteine alleviates high fat diet-induced hepatic steatosis and liver injuryviaregulating the intestinal microecology in mice
Source: Royal Society of Chemistry journal article supplement (doi:10.1039/d1fo03952k), 2022-01-01
Supplement: d1fo03952k5.pdf [file d1fo03952k5.pdf]

### **In vitro studies:**

#### **Cell culture and stimulation.**

The AML12 cells (ATCC® CRL-2254™) grown in DMEM/F-12 medium containing 10% (v/v) fetal bovine serum, 5 mg/mL insulin, 5 µg/mL transferrin, 5 ng/mL selenium, 40 ng/mL dexamethasone, 100 U/mL penicillin, 100 µg/mL streptomycin, and 2 mmol/L glutamine, in a humidified incubator at 37 °C in a 5% CO<sub>2</sub> atmosphere. The medium was changed every two days until the cells reached 80% confluence. The AML12 cells were treated with 100 ng/mL LPS and 1 mM NAC for 1 h.

#### **Measurement of TG.**

Intracellular lipids deposition was determined by the measurement of TG. For intracellular TG detection, cells were collected and lysed. The contents of TG and protein in lysate were determined by TG assay kit (Applygen, Beijing, China) and BCA kit (Beyotime, Shanghai, China) respectively, according to the manufacturer's instructions.

#### **Quantitative real-time polymerase chain reaction (qRT-PCR).**

RNA was extracted from AML12 cells using TRIzol reagent (Invitrogen, Carlsbad), according to the manufacturer's protocol. Synthesized primers and their sequences are the same as *vivo*.
