# Supplementary figures and images for: N-Acetylcysteine alleviates high fat diet-induced hepatic steatosis and liver injuryviaregulating the intestinal microecology in mice
Source: Royal Society of Chemistry journal article supplement (doi:10.1039/d1fo03952k), 2022-01-01

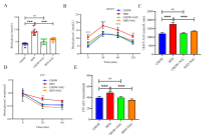

Supplement: d1fo03952k2.pdf [file d1fo03952k2.pdf]
